# Supplementary material for: Antibacterial activity of the micro and nanostructures of the optical material tris(8-hydroxyquinoline)aluminum and its application as an antimicrobial coating
Source: Royal Society of Chemistry journal article supplement (doi:10.1039/d2ra04750k), 2022-01-01
Supplement: d2ra04750k1.pdf [file d2ra04750k1.pdf]

## Supporting information

### The antibacterial activity of the micro and nanostructures of the optical material tris(8-hydroxyquinoline)aluminum and its application as an antimicrobial coating

Abdu Saeed<sup>a,b,c,\*</sup>, Aysh Y. Madkhli<sup>d</sup>, Rami Adel Pashameah<sup>e</sup>, Noor M. Bataweel<sup>f,g</sup>, Mir Ali Razvi<sup>a,\*</sup>, and Numan Salah<sup>c,\*</sup>

<sup>a</sup> Department of Physics, Faculty of Science, King Abdulaziz University, Jeddah 21589, Saudi Arabia

<sup>b</sup> Department of Physics, Tamar University, Tamar 87246, Yemen

<sup>c</sup> Center of Nanotechnology, King Abdulaziz University, Jeddah 21589, Saudi Arabia

<sup>d</sup> Department of Physics, Faculty of Science, Jazan University, Jazan 45142, Saudi Arabia

<sup>e</sup> Department of Chemistry, Faculty of Applied Science, Umm Al-Qura University, Makkah 24230, Saudi Arabia

<sup>f</sup> Department of Biological Science, Faculty of Science, King Abdulaziz University, Jeddah 21589, Saudi Arabia

<sup>g</sup> King Fahd Medical Research Centre, King Abdulaziz University, Jeddah 21589, Saudi Arabia

#### \* Corresponding Author

Mobile phone: +966563190832

E-mail: [Abdusaeed79@hotmail.com](mailto:Abdusaeed79@hotmail.com), [Abdusaeed@tu.edu.ye](mailto:Abdusaeed@tu.edu.ye)

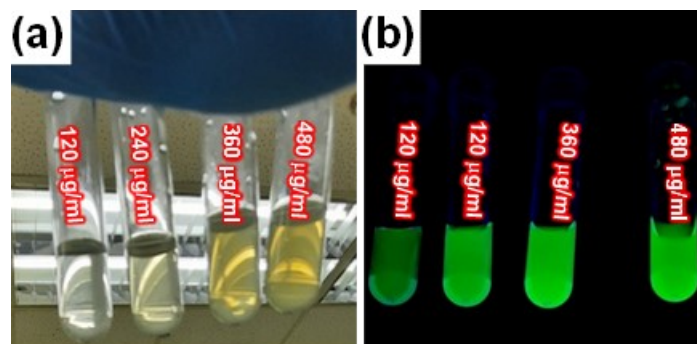

**Fig. S1.** Images for the Alq<sub>3</sub> NPs sample at concentrations of 120, 240, 360, and 480 μg/ml (a) an optical image in visible light and (b) a fluorescence image under UV with an excitation wavelength of 385 nm.

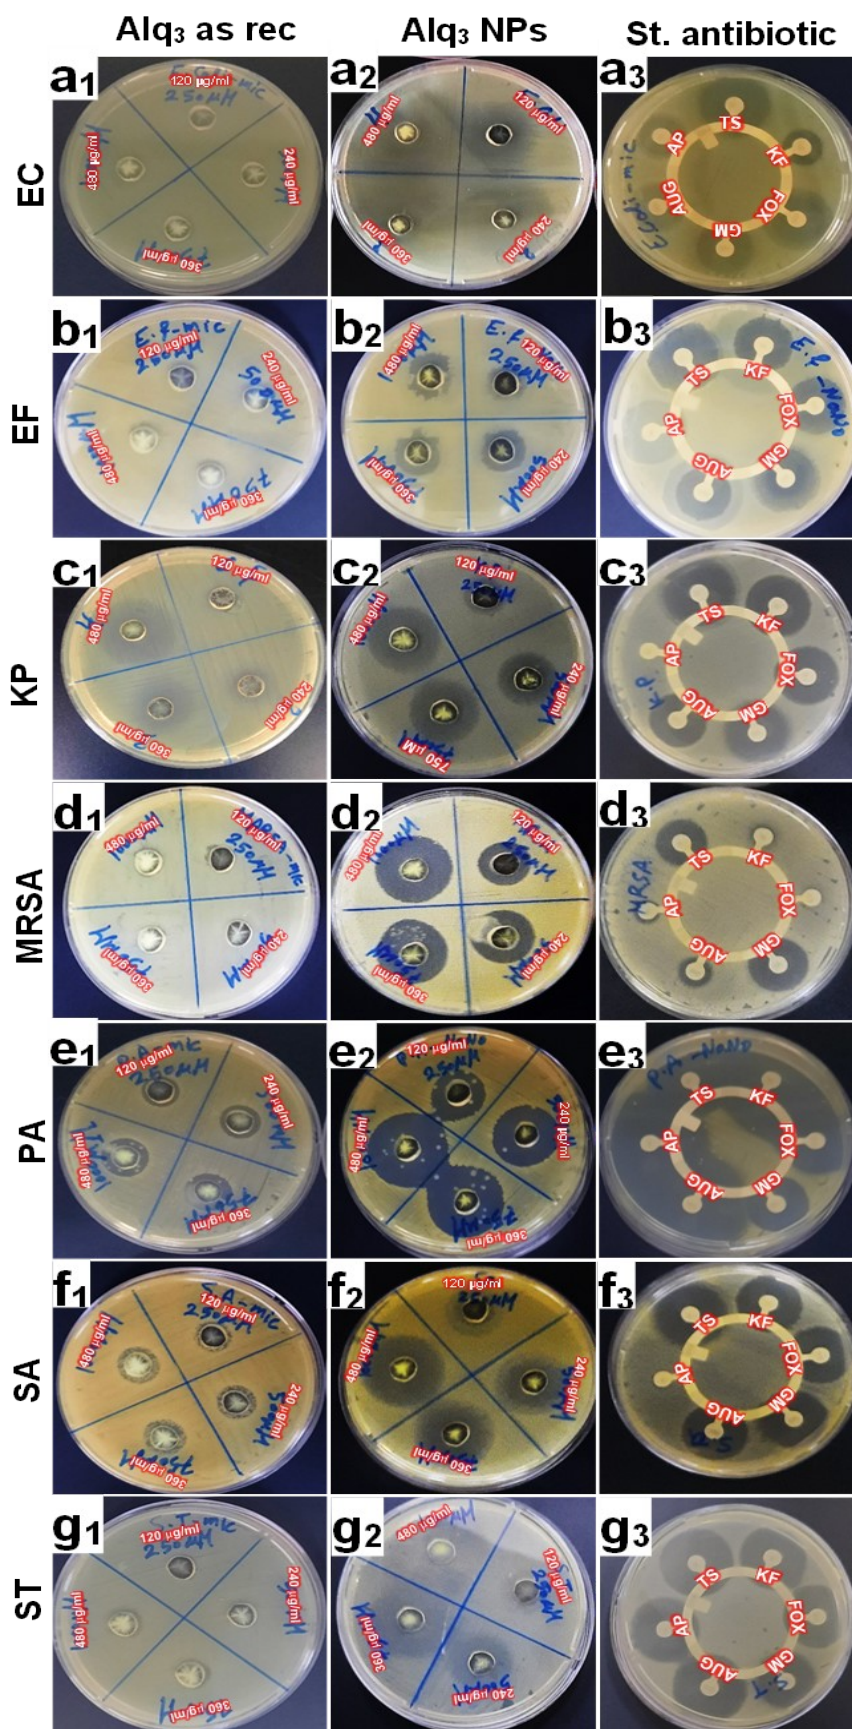

**Fig. S2.** The agar well diffusion assay for testing the antibacterial activity of both the Alq<sub>3</sub> as rec (first column), the Alq<sub>3</sub> NPs (second column), and the St. antibiotics AP 10 µg/disc, AU 30 µg/disc, GM 10 µg/disc, FOX 30 µg/disc, KF 30 µg/disc, and TS 25 µg/disc (third column) for 24 h incubation of the bacteria (EC, EF, KP, MRSA, PA, SA, and ST) that were spread on the agar plates with created well in the agar filled by the concentrations of 120, 240, 360, and 480 µg/ml.

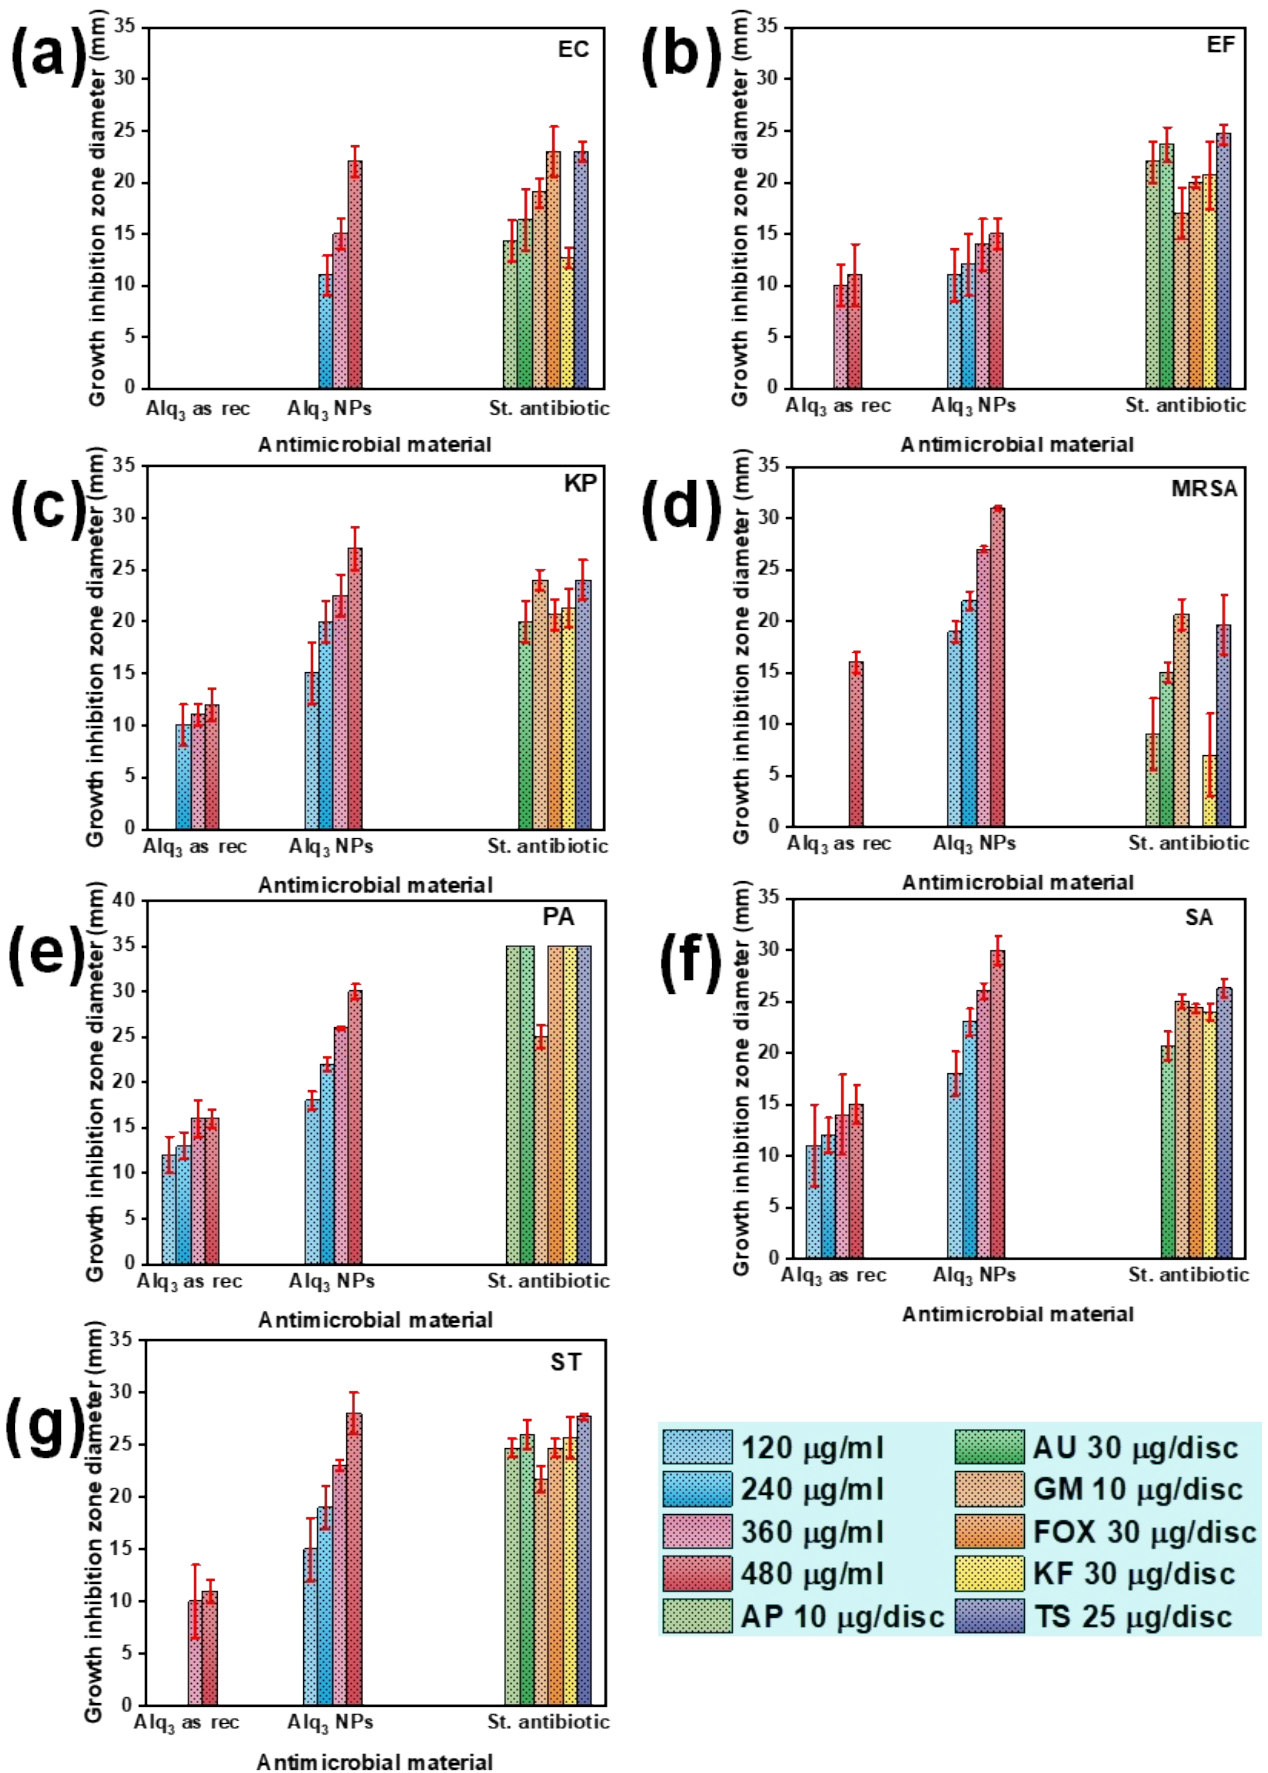

**Fig. S3.** Histogram demonstrating the inhibition zones for both the Alq<sub>3</sub> as rec the Alq<sub>3</sub> NPs samples (170 µl/well) at concentrations of 120, 240, 360, and 480 µg/ml, besides the St. antibiotics AP 10 µg/disc, AU 30 µg/disc, GM 10 µg/disc, FOX 30 µg/disc, KF 30 µg/disc, and TS 25 µg/disc against the bacteria strains EC, EF, KP, MRSA, PA, SA, and ST, which were incubated for 24 h.

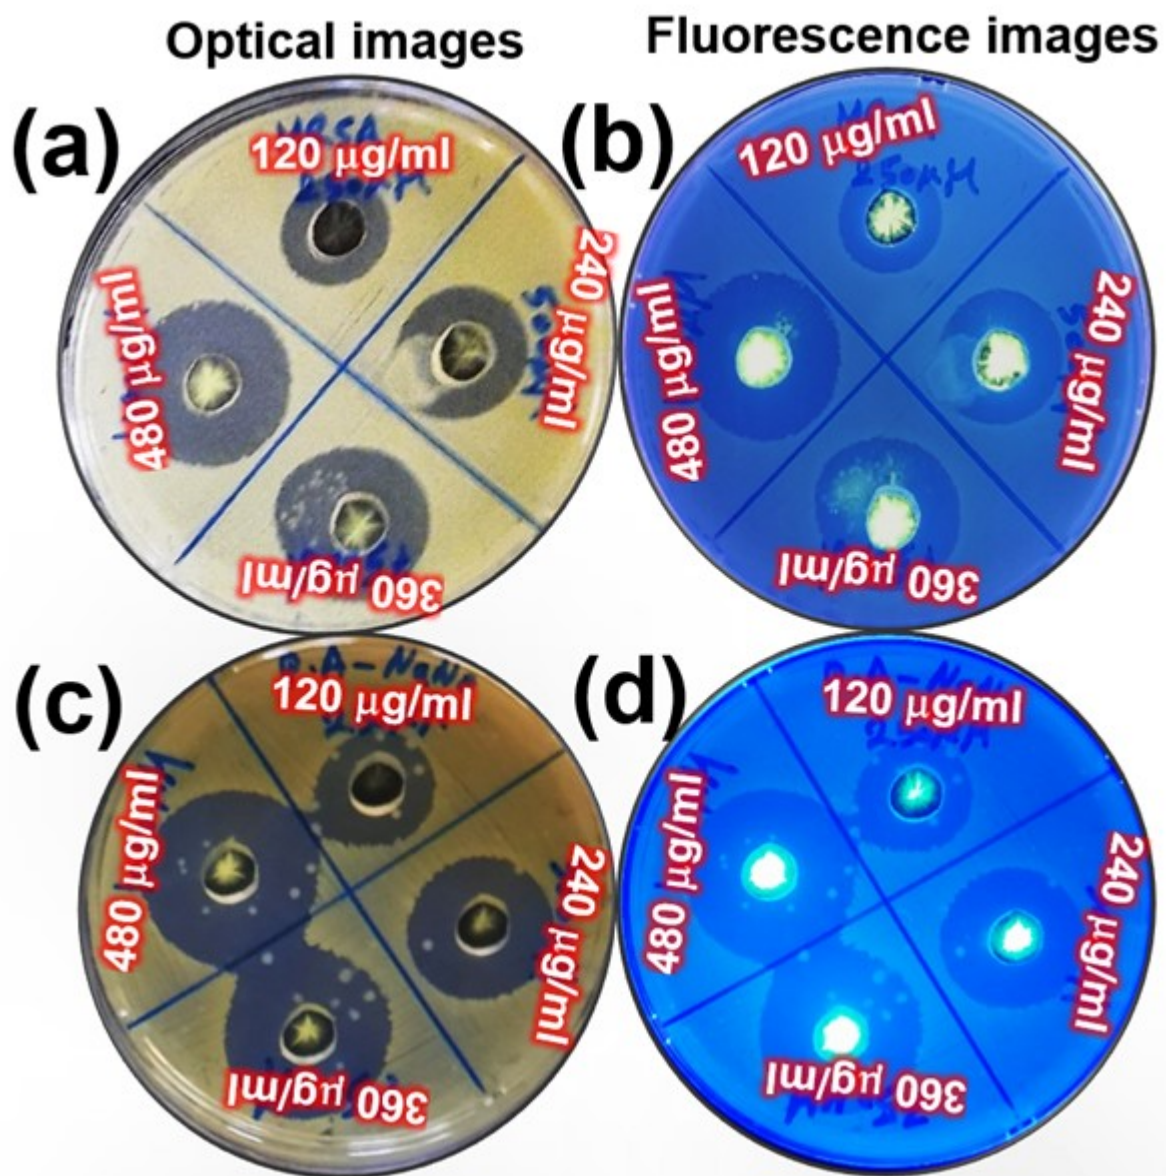

**Fig. S4.** Optical and fluorescent images of the agar plates with wells filled with Alq<sub>3</sub> NPs sample concentrations and cultured with (a and b) MRSA and (c and d) PA bacteria under normal light and UV (λ = 385 nm).

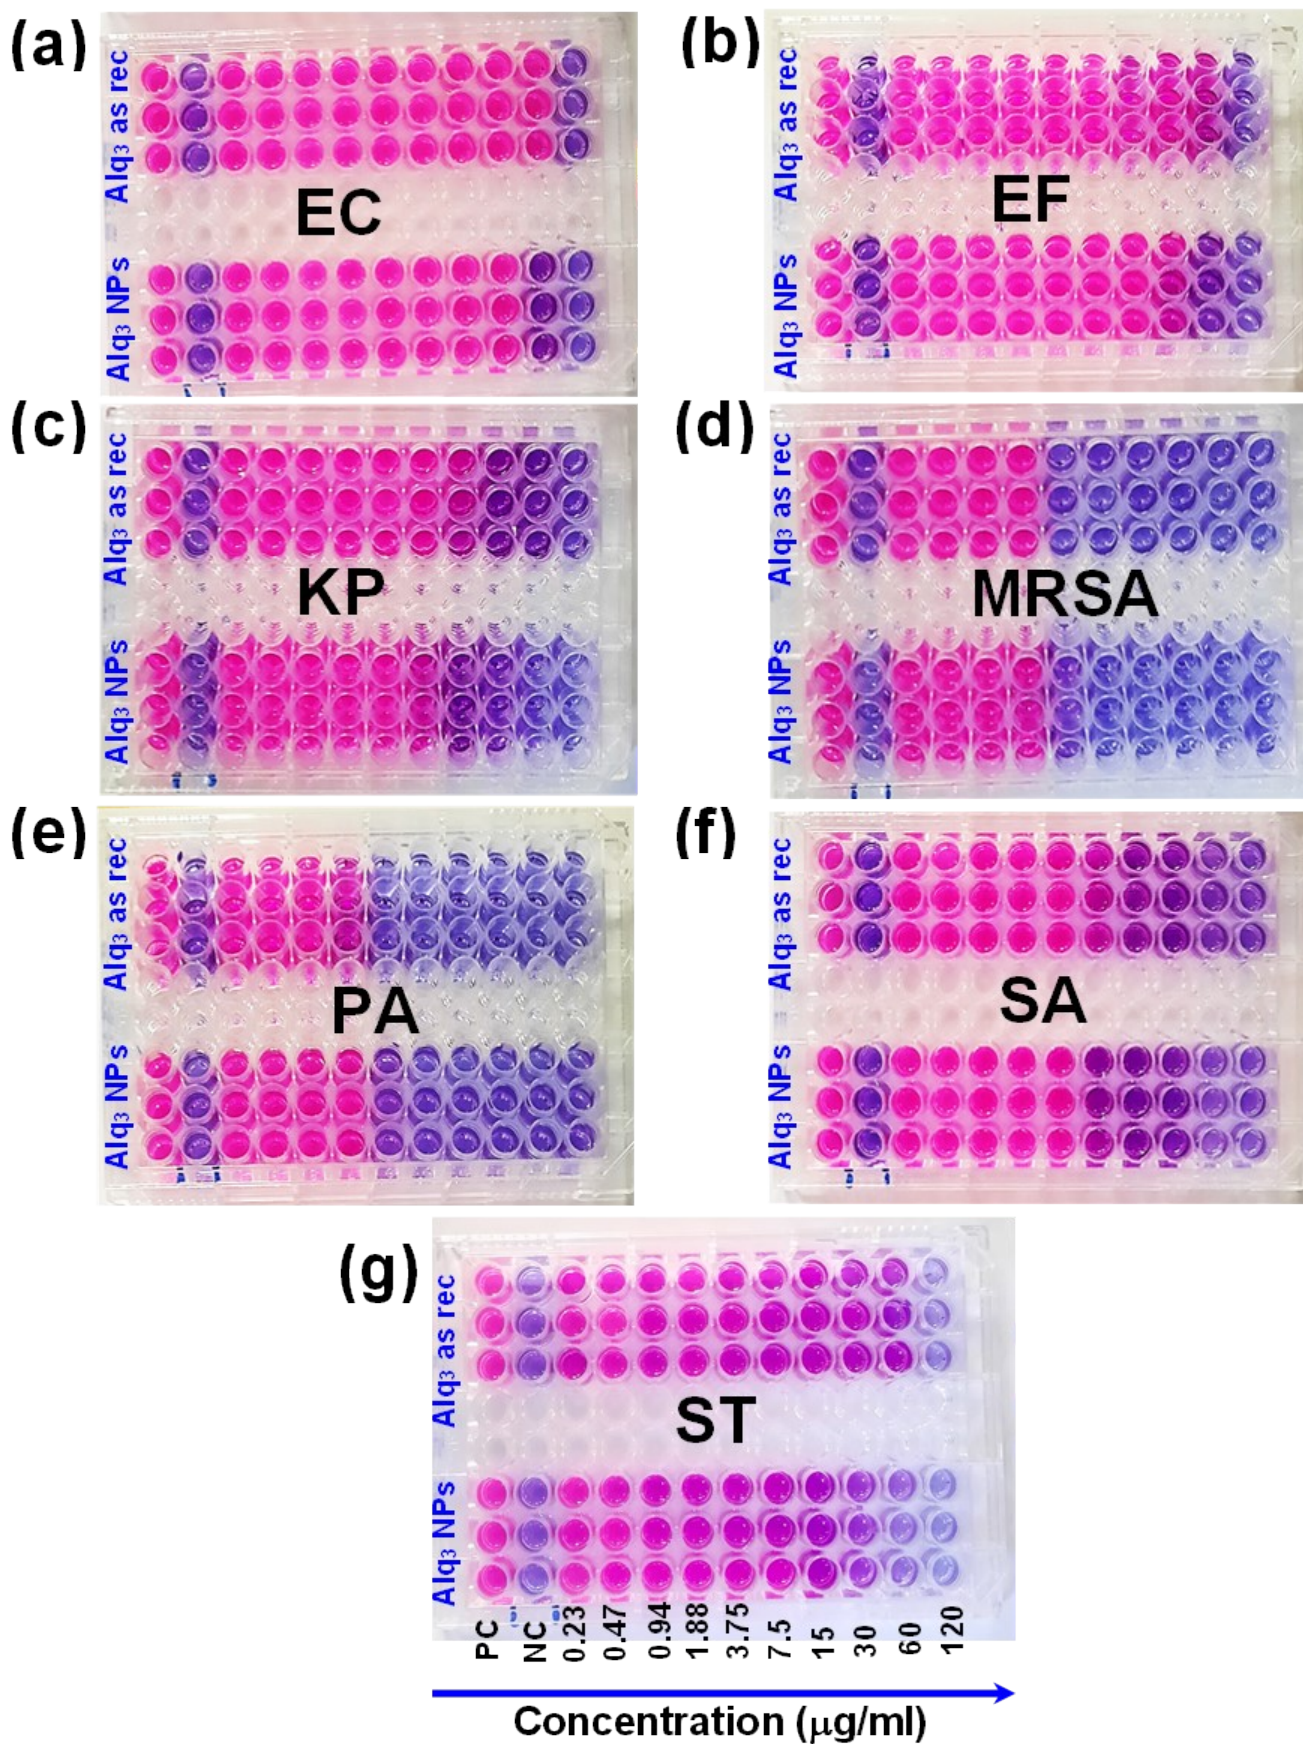

**Fig. S5.** The resazurin assay in the 96-well microtiter plates for testing the antibacterial activity of both the Alq<sub>3</sub> as rec and Alq<sub>3</sub> NPs samples at concentrations of 120, 60, 30, 15, 7.50, 3.75, 1.88, 0.94, 0.47, 0.23 µg/ml against the tested human pathogenic bacterial strains (a) EC, (b) EF, (c) KP, (d) MRSA, (e) PA, (f) SA, and (g) ST. The pink wells contain active bacteria, whereas the blue wells contain fewer active bacteria or killed bacteria.
